# Supplementary material for: Microbial Consortia and Mixed Plastic Waste: Pangenomic Analysis Reveals Potential for Degradation of Multiple Plastic Types via Previously Identified PET Degrading Bacteria
Source: MDPI journal article supplement (doi:10.3390/ijms23105612), 2022-05-17
Supplement: s1 [file s1]

**Table S1: Optical Density of each sample type for Biolog Ecoplates after 24 hours at room temperature**

| <b>Carbon Source</b>                | <b>9.1</b> | <b>9.2</b> | <b>10</b> | <b>13.1</b> | <b>13.2</b> | <b>FC</b> |
|-------------------------------------|------------|------------|-----------|-------------|-------------|-----------|
| L-Asparagine                        | 0.015      | 1.570      | 1.222     | 0.670       | 1.429       | 1.586     |
| D Galacturonic Acid                 | 0.024      | 0.027      | 0.485     | 0.029       | 1.102       | 1.167     |
| Putrescine                          | 0.000      | 0.851      | 0.836     | 0.458       | 1.199       | 1.079     |
| Tween40                             | 0.018      | 0.865      | 0.888     | 0.325       | 0.838       | 1.010     |
| L-Serine                            | 0.031      | 1.003      | 0.886     | 0.421       | 0.412       | 0.966     |
| $\gamma$ -Aminobutyric acid         | 0.023      | 0.719      | 0.706     | 0.487       | 0.855       | 0.873     |
| L-Arginine                          | 0.000      | 0.548      | 0.420     | 0.296       | 0.708       | 0.866     |
| D-Mannitol                          | 0.017      | 0.845      | 0.563     | 0.320       | 0.101       | 0.843     |
| 4-Hydroxy Benzoic Acid              | 0.000      | 0.461      | 0.668     | 0.237       | 0.669       | 0.679     |
| D-Galactonic Acid $\gamma$ -Lactone | 0.000      | 0.630      | 0.414     | 0.269       | 0.145       | 0.651     |
| D Glucosaminic Acid                 | 0.015      | 0.670      | 0.606     | 0.193       | 0.067       | 0.641     |
| Pyruvic Acid Methyl Ester           | 0.022      | 0.536      | 0.508     | 0.295       | 0.571       | 0.618     |
| Tween80                             | 0.047      | 0.365      | 0.417     | 0.034       | 0.764       | 0.577     |
| N-Acetyl Glucosamine                | 0.054      | 0.320      | 0.339     | 0.250       | 0.069       | 0.433     |
| 1-Glycerol phosphate                | 0.004      | 0.272      | 0.313     | 0.252       | 0.008       | 0.304     |
| Phenylethylamine                    | 0.010      | 0.000      | 0.051     | 0.013       | 0.463       | 0.242     |
| D-Xylose                            | 0.067      | 0.202      | 0.192     | 0.081       | 0.079       | 0.151     |
| D-Cellobiose                        | 0.034      | 0.171      | 0.046     | 0.056       | 0.031       | 0.079     |
| Glycyl-L Glutamic Acid              | 0.020      | 0.229      | 0.061     | 0.045       | 0.039       | 0.078     |
| Glycogen                            | 0.043      | 0.065      | 0.068     | 0.066       | 0.079       | 0.058     |
| L-Threonine                         | 0.020      | 0.095      | 0.196     | 0.026       | 0.053       | 0.054     |
| $\alpha$ -Keto Butyric Acid         | 0.026      | 0.059      | 0.036     | 0.036       | 0.000       | 0.038     |
| L Phenylalanine                     | 0.014      | 0.087      | 0.055     | 0.021       | 0.108       | 0.033     |
| D-Malic Acid                        | 0.000      | 0.046      | 0.096     | 0.021       | 0.026       | 0.020     |
| $\beta$ -Methyl-D Glucoside         | 0.021      | 0.050      | 0.013     | 0.000       | 0.000       | 0.017     |
| Itaconic Acid                       | 0.020      | 0.027      | 0.001     | 0.020       | 0.004       | 0.005     |
| Glucose-1- Phosphate                | 0.028      | 0.023      | 0.010     | 0.021       | 0.026       | 0.000     |
| $\alpha$ -D-Lactose                 | 0.000      | 0.036      | 0.035     | 0.000       | 0.000       | 0.000     |
| Erythritol                          | 0.016      | 0.005      | 0.003     | 0.015       | 0.038       | 0.000     |
| $\alpha$ - Cyclodextrin             | 0.009      | 0.319      | 0.007     | 0.000       | 0.027       | 0.000     |
| 2-Hydroxy Benzoic Acid              | 0.000      | 0.000      | 0.000     | 0.000       | 0.000       | 0.000     |
