# Supplementary material for: Microbial Consortia and Mixed Plastic Waste: Pangenomic Analysis Reveals Potential for Degradation of Multiple Plastic Types via Previously Identified PET Degrading Bacteria
Source: MDPI journal article supplement (doi:10.3390/ijms23105612), 2022-05-17
Supplement: s1 [file s1]

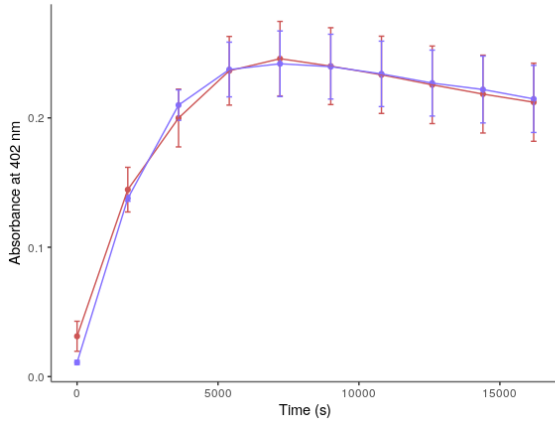

(a)

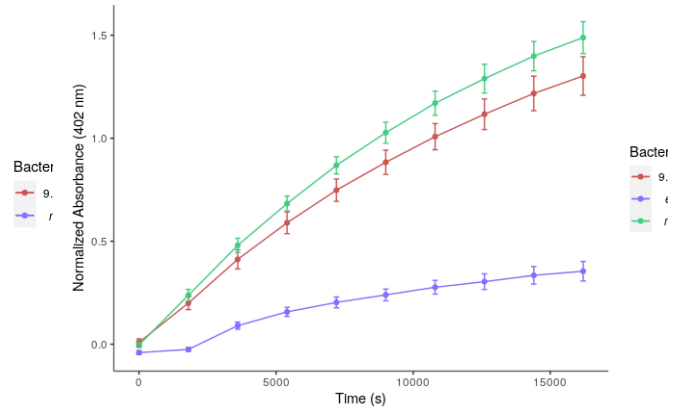

(b)

**Figure S3.** Deletion of NlhH resulted in no significant loss in esterase activity against p-np-butyrate unlike EstB; (a)  $\Delta nlhH$  on np-butyrate compared to wildtype control. (b)  $\Delta nlhH$  and  $\Delta estB$  esterase activity on p-np-butyrate compared to wildtype control.
